# Supplementary material for: Altered high-density lipoprotein composition and functions during severe COVID-19
Source: PubMed Central journal article supplement (PMC7841145; doi:10.1038/s41598-021-81638-1), 2021-01-27
Supplement: 41598_2021_81638_MOESM1_ESM.pdf [file 41598_2021_81638_MOESM1_ESM.pdf]

## **Altered high-density lipoprotein composition and functions during severe COVID-19**

Floran Begue<sup>1</sup>, Sébastien Tanaka<sup>1,2</sup>, Zarouki Mouktadi<sup>1</sup>, Philippe Rondeau<sup>1</sup>, Bryan Veeren<sup>1</sup>, Nicolas Diotel<sup>1</sup>, Alexy Tran-Dinh<sup>2,3</sup>, Tiphaine Robert<sup>4</sup>, Erick Vélia<sup>5</sup>, Patrick Mavingui<sup>6</sup>, Marie Lagrange-Xélot<sup>7</sup>, Philippe Montravers<sup>2,3,8</sup>, David Couret<sup>1,9,+</sup> and Olivier Meilhac<sup>1,10,\*,+</sup>

<sup>1</sup> Université de La Réunion, INSERM, UMR 1188 Diabète athérombose Réunion Océan Indien (DÉTROÏ), Saint-Denis de La Réunion, France.

<sup>2</sup> AP-HP, Service d'Anesthésie-Réanimation, CHU Bichat-Claude Bernard, 75018 Paris, France.

<sup>3</sup> Université de Paris, UFR Denis Diderot, Paris

<sup>4</sup> AP-HP, Service de Biochimie, CHU Bichat-Claude Bernard, 75018 Paris, France.

<sup>5</sup> Clinique Sainte-Clotilde, Groupe Clinifutur, Pôle mère enfant, 97490 Sainte-Clotilde, La Réunion, France.

<sup>6</sup> Université de La Réunion, UMR Processus Infectieux en Milieu Insulaire Tropical (PIMIT), INSERM 1187, CNRS 9192, IRD 249, 2 rue Maxime Rivière (GIP CYROI), 97490 Sainte-Clotilde, La Réunion, France.

<sup>7</sup> CHU de La Réunion, Service des maladies infectieuses, Saint-Denis, France.

<sup>8</sup> Inserm UMR 1152 Physiopathologie et épidémiologie des maladies respiratoires, Université Diderot, Paris

<sup>9</sup> CHU de La Réunion, Service de neuro-réanimation, Saint-Pierre, France.

<sup>10</sup> CHU de La Réunion, CIC-EC 1410, Saint-Pierre, France.

\* Corresponding author: [olivier.meilhac@inserm.fr](mailto:olivier.meilhac@inserm.fr)

<sup>+</sup>These authors contributed equally to this work

**Running Title:** HDL in COVID-19

# Supplementary Figure 1

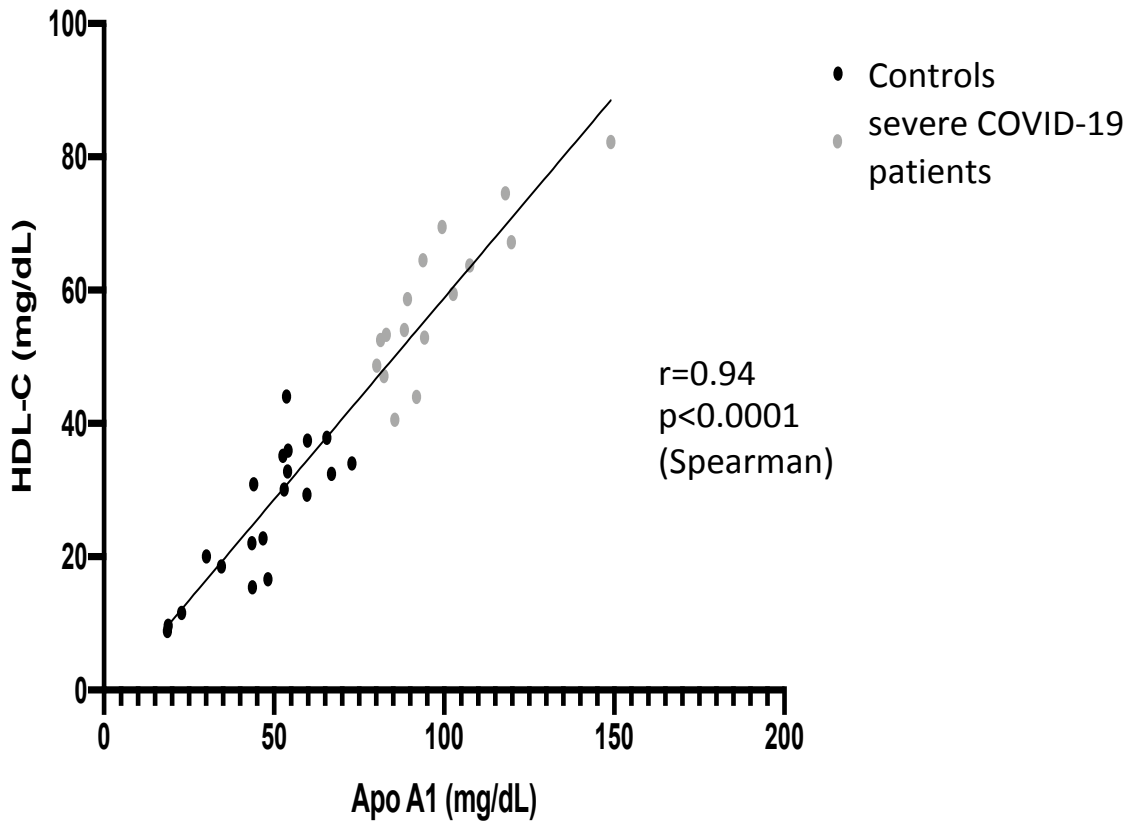

**Correlations between HDL-cholesterol (HDL-C) levels and ApoA-1 concentration in plasma assessed by quantitative mass spectrometry.** Controls are represented as grey circles and COVID-19 patients as black circles (all D1, D3 and D7 time points).

# Supplementary Figure 2

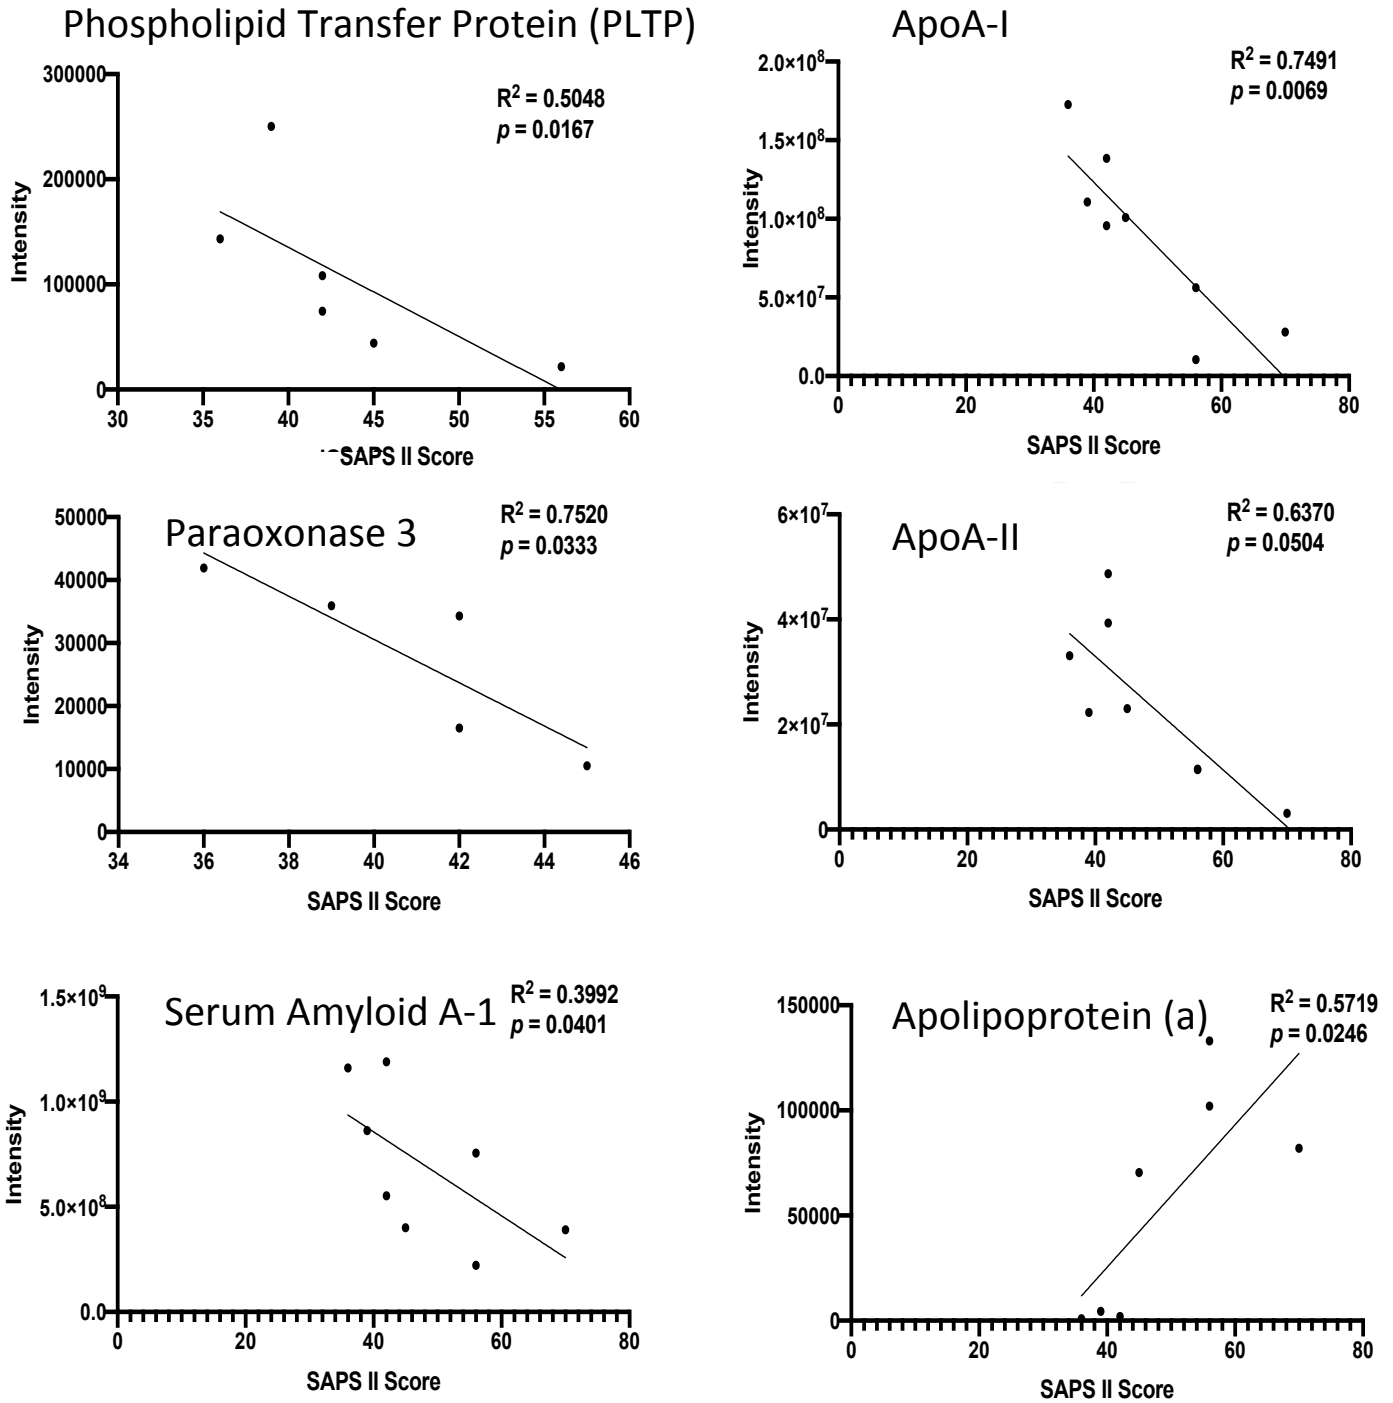

**Protein abundance at day 1 as a function of SAPSII (Simplified Acute Physiology Score II).** Protein intensity determined by MS analysis was plotted against SAPSII (severity score at admission). Spearman correlation test was performed and only proteins with  $p$  value  $\leq 0.05$  are presented.

## Supplementary Figure 3

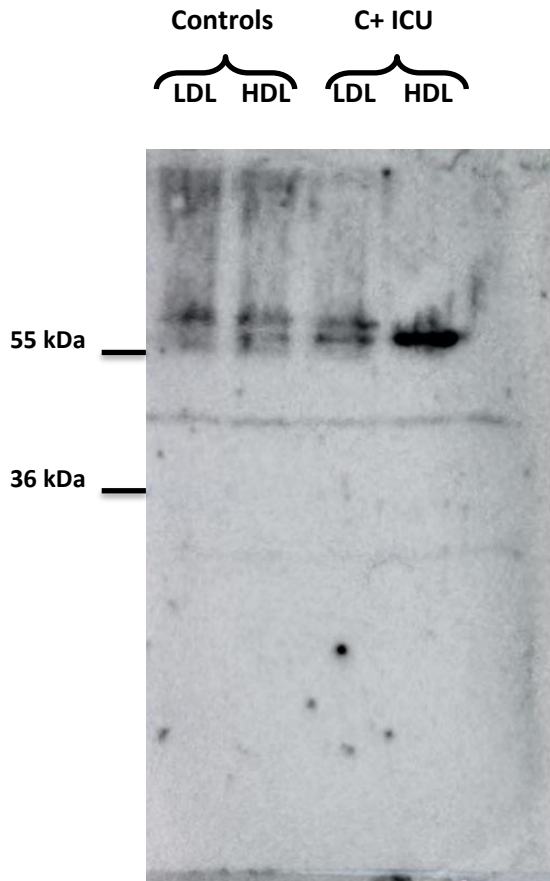

**Western blot analysis against alpha1-antitrypsin of pooled LDLs and HDLs isolated from control subjects or severe COVID-19 patients:** 3mg of total proteins were separated by SDS-PAGE, transferred and probed using anti-alpha1 antitrypsin antibody, followed by incubation with horse-radish peroxidase-conjugated secondary antibody and chemiluminescence reaction with ECL-Prime.

# Supplementary Figure 4

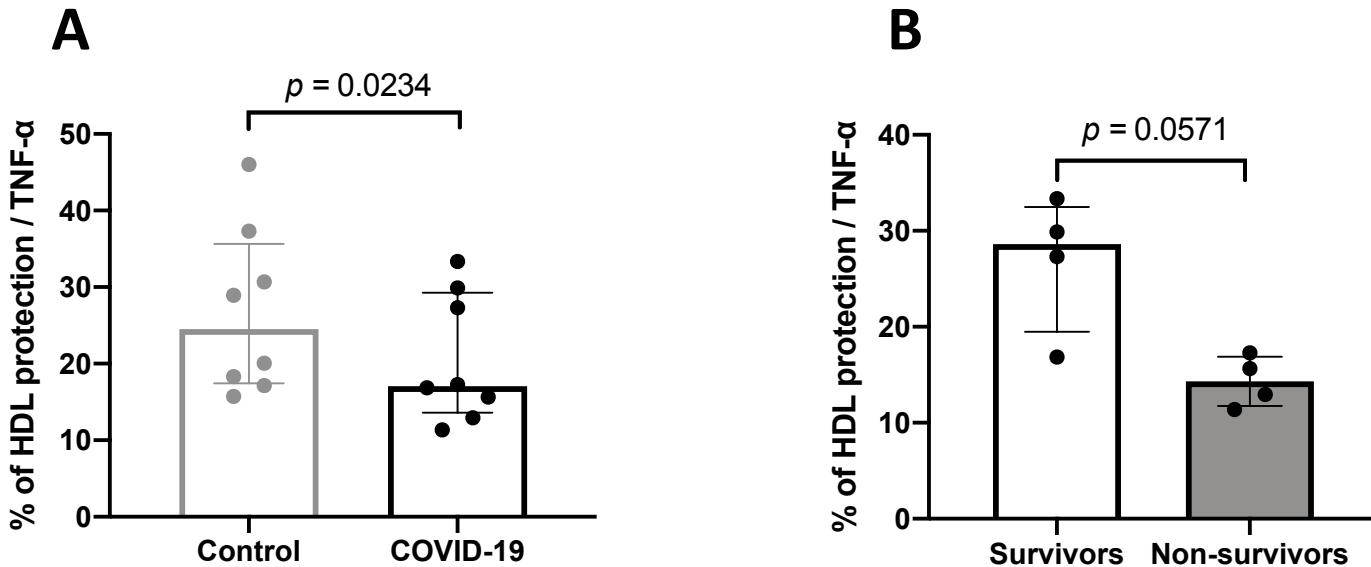

**Protection of TNF $\alpha$ -induced changes in endothelial cell impedance by HDLs isolated from controls vs COVID-19 patients (A) and from survivors vs non-survivors COVID-19 patients (B).** The percentage of protection was calculated as follows:  $[(AUC * 100) / \text{Mean} (AUC \text{ TNF-}\alpha)] - 100$ , where AUC represents the area under the curve during the 20 hours following stimulation with TNF- $\alpha$ . (A) HDLs were isolated from each COVID-19 patient and from age- gender-matched controls (HDLs from 2 controls were pooled and compared with each corresponding patient). (B) HDLs from survivors COVID-19 patients were compared to HDLs from non-survivors (n=4/group). Results are expressed as median +/- IQR. p values are indicated.
